# Supplementary material
Source: publisher figshare collection journal article supplement (https://gsajournals.figshare.com/ndownloader/files/20398677)
Supplement: Supplementary file 1 [file 20398677]

| Group | *vs.* Group | Difference  between means | Std Err of difference between means | Lower 95% CL | Upper 95% CL | *p*-Value |
| --- | --- | --- | --- | --- | --- | --- |
| db, Control | WT, Control | 6.29 | 1.15 | 3.30 | 9.28 | <.0001 |
| db, Control | WT, Treated | 5.88 | 1.06 | 3.12 | 8.65 | <.0001 |
| db, Control | db, Treated | 4.62 | 1.13 | 1.68 | 7.56 | 0.0004 |
| db, Treated | WT, Control | 1.67 | 0.69 | -0.142 | 3.48 | 0.0824 |
| db, Treated | WT, Treated | 1.26 | 0.54 | -0.145 | 2.67 | 0.0953 |
| WT, Treated | WT, Control | 0.40 | 0.58 | -1.11 | 1.91 | 0.8985 |
